# Supplementary material
Source: Springer Nature journal article supplement (https://www.springermedizin.de/resource/supplementary/12985_2009_785_MOESM3_ESM.pdf/9609186)

**A****HCVcc in culture medium**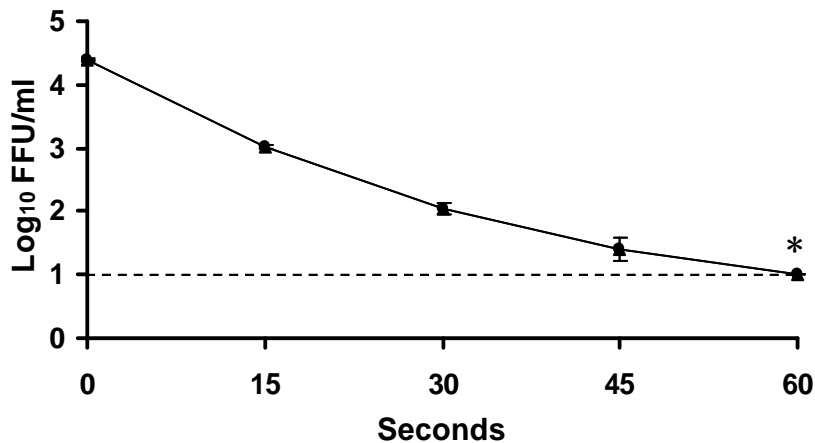**B****HCVcc in human serum**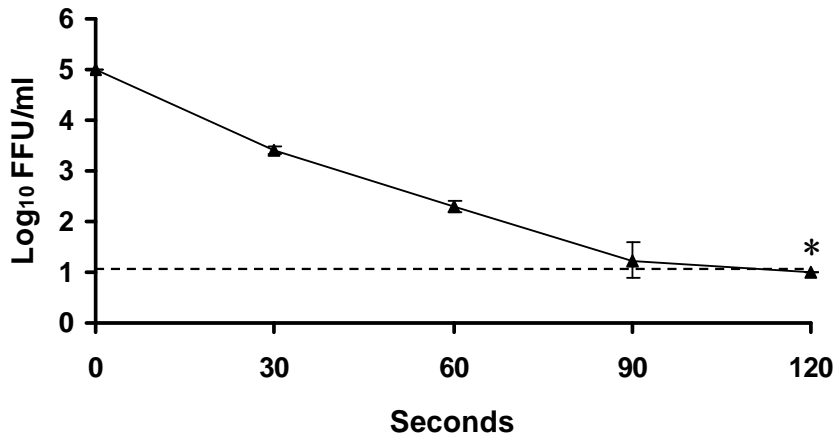

Supplement: MOESM3 [file 9609186]
